# Supplementary material
Source: Research Square preprint supplement (doi:10.21203/rs.3.rs-10404933/v1)
Supplement: Supplementary file 1 [file 2a581edf814f36d0fd47cb6b.docx]

**Table 1.** *PICOS algorithm for systematic review*

|  | Description |
| --- | --- |
| Population(P) | *Families with children or adolescents (0–18 years) diagnosed with any allergic condition, including food allergy, atopic dermatitis, allergic rhinitis, allergic asthma, urticaria, or anaphylaxis. The focus extends to parents, caregivers, or households directly involved in the child’s care.* |
| Intervention / Exposure  (I) | *Presence of an allergic disease in the child or adolescent and its impact on the family’s quality of life and/or parental burden.* |
| Comparison (C) | *Families without allergic children, or between subgroups of families depending on allergy type (e.g., food vs. respiratory allergy), disease severity, or other sociodemographic factors. Some observational studies may lack a control group.* |
| Outcomes  (O) | *Assessment of quality of life (QoL) and/or health-related quality of life (HRQoL) among families of allergic children, including parental burden, family burden, psychosocial adjustment and overall family functioning.* |
| Study Design (S) | *Observational studies (cross-sectional, cohort, or case-control) that quantitatively or qualitatively assess family or parental quality of life using validated instruments (e.g., FAQL-PB, DFI, FDLQI, PedsQL-FIM, , etc.). Both disease-specific and generic family QoL instruments were included*. |

**Table 2.** Keywords for the Search in Databases

**Search String**

( allergic disease* OR "food allergy" OR "allergic asthma" OR "atopic dermatitis" OR "allergic rhinitis" OR urticaria OR "venom allergy" OR anaphylaxis ) AND ( child* OR adolescen* OR pediatric* OR paediatric* OR infant* OR toddler* OR preschool* OR youth OR teen* ) AND ( "quality of life" OR QoL OR HRQoL OR "family quality of life" ) AND ( family OR parent* OR caregiver* OR "family impact" OR "family burden" OR "parental stress").

**Table 3.** *Inclusion and Exclusion Criteria*

**Inclusion Criteria**

1. *Observational studies (cross-sectional, cohort, or case-control) investigating the quality of life (QoL) or health-related quality of life (HRQoL) of families, parents, or caregivers of children and adolescents with allergic diseases.*
2. *Studies examining families of paediatric patients diagnosed with any allergic condition, including food allergies, atopic dermatitis, allergic rhinitis, allergic asthma, urticaria, or anaphylaxis.*
3. *Articles published in English or Greek.*
4. *Studies were published between January 2005 and September 2025.*
5. *Eligible studies had to report quantitative or qualitative data using validated QoL or psychosocial assessment tools (e.g., FAQL-PB, DFI, FDLQI, PedsQL-FIM, CHVAQoLS, etc.).*
6. *Studies including mixed-age samples were eligible only if data for families with children/adolescents (0–18 years) were presented separately.*
7. *Studies explicitly examined the psychosocial, emotional, or functional impact of allergic diseases on family dynamics, parental stress, or caregiver burden.*
8. *Peer-reviewed journal articles with full-text availability.*

**Exclusion Criteria**

1. *Interventional studies were excluded; however, longitudinal observational studies evaluating changes in family quality of life over time without assessing therapeutic efficacy were considered eligible.*
2. *Case reports, editorials, conference abstracts, letters to the editor, books, or review papers.*
3. *Studies not focusing on families or caregivers (e.g., studies assessing only paediatric patients without family-level analysis).*
4. *Studies lacking validated instruments for QoL.*
5. *Studies in which data regarding age groups or family characteristics were not specified or could not be extracted.*
6. *Articles not published in English or Greek.*
7. *Studies addressing only specific allergic symptoms or comorbidities (e.g., focusing exclusively on pharmacological outcomes, diagnostic testing, or biological markers without QoL assessment).*
8. *Academic grey literature, non-published or sources that have not undergone peer review.*

**Table 4.** Characteristics of eligible studies

|  | Author (Year) | Country | Study Design | Allergy | Parents/ Caregivers N | Child Age or Range (Years) | Instrument | Outcome type |
| --- | --- | --- | --- | --- | --- | --- | --- | --- |
| 1 | Jirakova (2012) | Czech Republic | Cross-sectional | AD | 202 | 0–18 | DFI | Family QoL |
| 2 | Chernyshov (2015) | Multicenter | Cross-sectional | AD | 167 | 5–16 | DFI | Family QoL |
| 3 | Comlek (2020) | Turkey | Cross-sectional | AD | 120 | 0–18 | FDLQI | Family QoL |
| 4 | Ricci (2007) | Italy | Cross-sectional | AD | 44 | 0-7 | DFI | Family QoL |
| 5 | Ghani (2013) | Malaysia | Cross-sectional | AD | 110 | 5–18 | DFI | Family QoL |
| 6 | Barber (2025) | USA | Cross-sectional | FA | 94 | 8-18 | FAQL-PB | Burden |
| 7 | Ward (2016) | USA | Cross-sectional | FA | 2308 | NR | FAQL-PB | Burden(Heterogenous population) |
| 8 | Maksimovic (2019) | Serbia | Cohort | AD | 98 | 0–16 | DFI | Family QoL |
| 9 | Allen (2015) | Australia | Cross-sectional | FA | 167 | 0–17 | FAQL-PB | Burden |
| 10 | Jang (2016) | Korea | Cross-sectional | AD | 78 | 0–16 | DFI | Family QoL |
| 11 | Siafaka (2020) | Greece | Cross-sectional | AD | 75 | NR | DFI | Family QoL |
| 12 | Ailawadi (2024) | India | Cross-sectional | AD | 30 | 1-11 | DFI | Family QoL |
| 13 | Campos (2017) | Brazil | Cross-sectional | AD | 51 | 5–16 | DFI | Family QoL |
| 14 | Raznatovic (2021) | Montenegro | Cross-sectional | AD | 200 | 5–16 | DFI | Family QoL |
| 15 | Fathi (2016) | Iran | Cross-sectional | FA | 90 | NR | FAQL-PB | Burden |
| 16 | Saeki (2023) | Japan | Cross-sectional | AD | 5702 | 0–<18 | DFI | Family QoL |
| 17 | Al Robaee (2010) | Saudi Arabia | Cross-sectional | AD | 774 | 1-11 | DFI | Family QoL |
| 18 | Otsuka (2024) | Japan | Cross-sectional | AD | 537 | ≤17 | DFI | Family QoL |
| 19 | Chernyshov (2013) | Multicenter | Cross-sectional | AD | 419 | <4 | DFI | Family QoL |
| 20 | Ezzedine (2020) | France | Cross-sectional | AD | 399 | 12–17 | ABS-F | QoL |
| 21 | Cummings (2010) | UK | Cross-sectional | FA | 41 | 6–16 | FAQL-PB | Burden |
| 22 | Morawska (2022) | Australia | Cross-sectional | Mixed | 106 | 2–10 | PedsQL-FIM | QoL |
| 23 | Pedersen (2021) | Bangladesh | Cross-sectional | AD | 267 | <5 | DFI | QoL |
| 24 | Acaster (2020) | UK | Cross-sectional | FA | 100 | 4–15 | FAQL-PB | Burden |
| 25 | Pustisek (2016) | Croatia | Cross-sectional | AD | 171 | 0-7 | FDLQI | QoL |
| 26 | Kajornrattana (2018) | Thailand | Cross-sectional | FA | 200 | <5 | FAQL-PB | Burden |
| 27 | Patel (2018) | USA | Cross-sectional | FA | 966 | <18 | FAQL-PB | Burden |
| 28 | Raznatovic Djurovic (2020) | Montenegro | Cross-sectional | AD | 186 | 0–4 | DFI | QoL |
| 29 | Monti (2011) | Italy | Cross-sectional | AD | 60 | 1–12 | DFI | QoL |
| 30 | Marciniak (2017) | Poland | Cross-sectional | AD | 96 | NR | FDLQI | QoL |
| 31 | Ozsaydi (2021) | Turkey | Cross-sectional | AD | 83 | 2–7 | FIS-DD | QoL |
| 32 | Leung (2009) | Hong Kong | Cross-sectional | FA | 197 | 2–7 | FAQL-PB | Burden |
| 33 | Kobusiewicz (2023) | Poland | Cross-sectional | AD | 88 | 0-17 | FDLQI | QoL |
| 34 | Barbarot (2022) | International | Cross-sectional | AD | 7465 | NR | DFI | QoL |
| 35 | Kotarski (2023) | Croatia | Cross-sectional | AD | 330 | 1.5-5 | FDLQI | QoL |
| 36 | Al Shobaili (2010) | Saudi Arabia | Cross-sectional | AD | 447 | Mean 5.5 | DFI | QoL |
| 37 | Ho (2010) | Singapore | Cross-sectional | AD | 104 | NR | DFI | QoL |
| 38 | Pappalardo (2022) | USA | Cohort | FA | 365 | Mean 5.8 | FAQL-PB | Burden |
| 39 | Williams (2015) | USA | Cross-sectional | FA | 299 | 0-18 | FAQL-PB | Burden |
| 40 | Kisieliene (2024) | Lithuania | Cross-sectional | AD | 247 | <18 | FDLQI | QoL |
| 41 | Springston (2010) | USA | Cross-sectional | FA | 1126 | <18 | FAQL-PB | Burden |
| 42 | Howe (2014) | USA | Cross-sectional | FA | 305 | NR | FAQL-PB | Burden |
| 43 | Chernyshov (2014) | Ukraine | Cross-sectional | AD | 30 | NR | DFI | QoL |
| 44 | Klinnert (2014) | USA | Cohort | EoE | 97 | NR | PedsQL-FIM | QoL |
| 45 | Jung (2023) | Korea | Cross-sectional | FA | 190 | 0-17 | FAQL-PB | Burden |
| 46 | Mozyrska (2023) | Ukraine | Cross-sectional | AD | 104 | NR | FDLQI | QoL |
| 47 | Wisuthsarewong (2017) | Thailand | Cross-sectional | AD | 86 | <16 | DFI | QoL |
| 48 | Andrade (2023) | Brazil | Longitudinal | AD | 20 | 1–12 | DFI | QoL |
| 49 | Tawfik (2023) | UK | Cross-sectional | AD | 98 | 0–16 | FDLQI | QoL |
| 50 | Kelbore (2025) | Ethiopia | Cross-sectional | AD | 461 | ≤16 | DFI | QoL |
| 51 | Knibb (2012) | UK | Cross-sectional | FA | 754 | 5–18 | FAQL-PB | Burden |

*AD = Atopic Dermatitis; FA = Food Allergy; EoE = Eosinophilic Esophagitis; DFI = Dermatitis Family Impact; FDLQI = Family Dermatology Life Quality Index; FAQL-PB = Food Allergy Quality of Life Questionnaire – Parental Burden; ABS-F = Atopic Burden Scale – Family; FIS-DD = Family Impact Scale for Developmental Disorders; NR = Not Reported.*

|  |  | The methodological quality assessment using the Newcastle–Ottawa Scale and RELEVANT tool is presented in Table 5.  **Table 5.**  Methodological quality assessment using the Newcastle–Ottawa Scale (NOS) and RELEVANT tool | | | | | | | | | | | | | | | | | | |  | |  | |  | |
| --- | --- | --- | --- | --- | --- | --- | --- | --- | --- | --- | --- | --- | --- | --- | --- | --- | --- | --- | --- | --- | --- | --- | --- | --- | --- | --- |
|  |  | | **Newcastle–Ottawa Scale (NOS) Quality Assessment** | | | | | | | | | | **REal Life EVidence AssessmeNt Tool (RELEVANT** | | | | | | | | | | **Quality** | |  | |
| # | Study (Author, Year) | | Selection | | | | Comparability | | Exposure/Outcome | | | Total Score | **1** | **2** | **3** | **4** | **5** | **6** | **7** | **Total Score** | |  | |  | |
| 1 | 2 | 3 | 4 | 5 | 6 | 7 | 8 | 9 | (0–9) | (0-7) | |  | |
| 1 | Jirakova et al. (2012) | | ★ | ✖ | ★ | ★ | ★ | ✖ | ★ | ★ | ★ | 7 | ★ | ★ | ★ | ✖ | ★ | ✖ | ★ | 5 | | Moderate | |  | |
| 2 | Chernyshov et al. (2015) | | ★ | ★ | ★ | ★ | ✖ | ✖ | ★ | ★ | ✖ | 6 | ★ | ✖ | ★ | ✖ | ★ | ★ | ★ | 5 | | Moderate | |  | |
| 3 | Çömlek et al. (2020) | | ★ | ✖ | ★ | ★ | ★ | ✖ | ★ | ★ | ★ | 7 | ★ | ✖ | ★ | ✖ | ★ | ★ | ★ | 5 | | Moderate | |  | |
| 4 | Ricci et al. (2007) | | ★ | ✖ | ★ | ★ | ★ | ✖ | ★ | ★ | ★ | 7 | ★ | ★ | ★ | ✖ | ★ | ★ | ★ | 6 | | High | |  | |
| 5 | Ghani et al. (2013) | | ★ | ★ | ★ | ★ | ★ | ✖ | ★ | ★ | ★ | 8 | ★ | ★ | ★ | ★ | ★ | ★ | ★ | 7 | | High | |  | |
| 6 | Barber et al. (2025) | | ★ | ★ | ★ | ★ | ★ | ★ | ★ | ★ | ★ | 9 | ★ | ★ | ★ | ★ | ★ | ★ | ★ | 7 | | High | |  | |
| 7 | Ward et al. (2016) | | ✖ | ★ | ★ | ★ | ★ | ★ | ★ | ★ | ★ | 8 | ★ | ★ | ★ | ✖ | ★ | ★ | ★ | 6 | | High | |  | |
| 8 | Kelbore et al. (2025) | | ★ | ★ | ★ | ★ | ★ | ✖ | ★ | ★ | ★ | 8 | ★ | ★ | ★ | ✖ | ★ | ★ | ★ | 6 | | High | |  | |
| 9 | Andrade et al. (2023) | | ✖ | ✖ | ★ | ★ | ★ | ✖ | ★ | ★ | ✖ | 5 | ★ | ✖ | ★ | ✖ | ★ | ★ | ★ | 5 | | Moderate | |  | |
| 10 | Chernyshov et al. (2014) | | ★ | ✖ | ★ | ★ | ★ | ✖ | ★ | ★ | ✖ | 6 | ★ | ✖ | ★ | ✖ | ★ | ★ | ★ | 5 | | Moderate | |  | |
| 11 | Siafaka et al. (2020) | | ✖ | ★ | ★ | ★ | ★ | ✖ | ★ | ★ | ✖ | 6 | ★ | ★ | ★ | ✖ | ★ | ★ | ✖ | 5 | | Moderate | |  | |
| 12 | Ailawadi et al. (2024) | | ✖ | ✖ | ★ | ★ | ★ | ✖ | ★ | ★ | ✖ | 5 | ★ | ✖ | ★ | ✖ | ★ | ★ | ★ | 5 | | Moderate | |  | |
| 13 | Campos et al.  (2017) | | ★ | ✖ | ★ | ★ | ★ | ✖ | ★ | ★ | ✖ | 6 | ★ | ✖ | ★ | ✖ | ★ | ★ | ★ | 5 | | Moderate | |  | |
| 14 | Raznatović et al. (2021) | | ★ | ★ | ★ | ★ | ★ | ★ | ★ | ★ | ★ | 9 | ★ | ★ | ★ | ★ | ★ | ★ | ★ | 7 | | High | |  | |
| 15 | Ezzedine et al. (2020) | | ★ | ★ | ★ | ★ | ★ | ✖ | ★ | ★ | ★ | 8 | ★ | ✖ | ★ | ✖ | ★ | ★ | ★ | 5 | | Moderate | |  | |
| 16 | Maksimovic et al. (2019) | | ★ | ★ | ★ | ★ | ★ | ★ | ★ | ★ | ★ | 9 | ★ | ★ | ★ | ★ | ★ | ★ | ★ | 7 | | High | |  | |
| 17 | Allen et al. (2015) | | ★ | ✖ | ★ | ★ | ★ | ★ | ★ | ★ | ★ | 8 | ★ | ★ | ★ | ✖ | ★ | ★ | ★ | 6 | | High | |  | |
| 18 | Jang et al. (2016) | | ★ | ★ | ★ | ★ | ★ | ✖ | ★ | ★ | ★ | 8 | ★ | ★ | ★ | ✖ | ★ | ★ | ★ | 6 | | High | |  | |
| 19 | Klinnert et al. (2014) | | ★ | ★ | ★ | ★ | ★ | ★ | ★ | ★ | ★ | 9 | ★ | ★ | ★ | ★ | ★ | ★ | ★ | 7 | | High | |  | |
| 20 | Chernyshov et al. (2013) | | ★ | ✖ | ★ | ★ | ★ | ✖ | ★ | ★ | ✖ | 6 | ★ | ★ | ★ | ★ | ★ | ✖ | ★ | 6 | | High | |  | |
| 21 | Cummings et al. (2010) | | ✖ | ✖ | ★ | ★ | ★ | ✖ | ★ | ★ | ✖ | 5 | ★ | ★ | ★ | ★ | ✖ | ★ | ★ | 6 | | High | |  | |
| 22 | Morawska et al. (2022) | | ★ | ✖ | ★ | ★ | ★ | ★ | ★ | ★ | ✖ | **7** | ★ | ★ | ★ | ★ | ★ | ★ | ✖ | 6 | | High | |  | |
| 23 | Pedersen et al. (2021) | | ★ | ★ | ★ | ★ | ★ | ✖ | ★ | ★ | ★ | 8 | ★ | ✖ | ★ | ✖ | ★ | ★ | ★ | 5 | | Moderate | |  | |
| 24 | Jung et al. (2023) | | ✖ | ★ | ★ | ★ | ★ | ★ | ★ | ★ | ★ | 8 | ★ | ★ | ★ | ★ | ★ | ★ | ★ | 7 | | High | |  | |
| 25 | Fathi et al. (2016) | | ✖ | ✖ | ★ | ★ | ★ | ✖ | ★ | ★ | ★ | 6 | ★ | ✖ | ★ | ✖ | ★ | ★ | ★ | 5 | | Moderate | |  | |
| 26 | Saeki et al. (2023) | | ★ | ★ | ★ | ★ | ★ | ✖ | ★ | ★ | ✖ | 7 | ★ | ★ | ★ | ★ | ★ | ✖ | ★ | 6 | | High | |  | |
| 27 | Otsuka et al. (2024) | | ★ | ★ | ★ | ★ | ★ | ★ | ★ | ★ | ★ | 9 | ★ | ★ | ★ | ★ | ★ | ★ | ★ | 7 | | High | |  | |
| 28 | Raznatović Djurovic (2020) | | ★ | ★ | ★ | ★ | ★ | ✖ | ★ | ★ | ★ | 8 | ★ | ★ | ★ | ✖ | ★ | ★ | ★ | 6 | | Moderate | |  | |
| 29 | Monti et al. (2011) | | ★ | ★ | ★ | ★ | ★ | ★ | ★ | ★ | ✖ | 8 | ★ | ★ | ★ | ✖ | ★ | ★ | ★ | 6 | | High | |  | |
| 30 | Marciniak et al. (2017) | | ✖ | ★ | ★ | ★ | ★ | ✖ | ★ | ★ | ✖ | 6 | ★ | ★ | ★ | ✖ | ★ | ✖ | ★ | 5 | | Moderate | |  | |
| 31 | Ozsaydı et al. (2021) | | ★ | ★ | ✖ | ★ | ★ | ★ | ★ | ★ | ★ | 8 | ✖ | ★ | ★ | ★ | ★ | ★ | ★ | 6 | | High | |  | |
| 32 | Leung et al. (2009) | | ★ | ★ | ✖ | ★ | ★ | ★ | ★ | ★ | ★ | 8 | ★ | ★ | ★ | ★ | ★ | ★ | ★ | 7 | | High | |  | |
| 33 | Al Robaee (2010) | | ✖ | ★ | ★ | ★ | ★ | ✖ | ★ | ★ | ✖ | 6 | ★ | ★ | ★ | ✖ | ★ | ★ | ★ | 6 | | Moderate | |  | |
| 34 | Acaster et al. (2020) | | ★ | ✖ | ★ | ★ | ★ | ★ | ★ | ★ | ★ | 8 | ★ | ★ | ★ | ★ | ★ | ★ | ★ | 7 | | High | |  | |
| 35 | Pustišek et al. (2016) | | ★ | ★ | ★ | ★ | ★ | ★ | ★ | ★ | ✖ | 8 | ★ | ★ | ★ | ★ | ★ | ★ | ★ | 7 | | High | |  | |
| 36 | Kajornrattana et al. (2018) | | ★ | ★ | ★ | ✖ | ★ | ✖ | ★ | ★ | ✖ | 6 | ★ | ★ | ★ | ✖ | ★ | ✖ | ★ | 5 | | Moderate | |  | |
| 37 | Patel et al. (2018) | | ★ | ★ | ★ | ★ | ★ | ✖ | ★ | ★ | ★ | 8 | ★ | ★ | ★ | ★ | ★ | ★ | ★ | 7 | | High | |  | |
| 38 | Williams et al. (2015) | | ★ | ★ | ✖ | ★ | ★ | ★ | ★ | ★ | ✖ | 7 | ★ | ★ | ★ | ✖ | ★ | ★ | ★ | 6 | | High | |  | |
| 39 | Wisuthsarewong et al. (2017) | | ★ | ★ | ★ | ★ | ★ | ✖ | ★ | ★ | ★ | 8 | ★ | ✖ | ★ | ✖ | ★ | ★ | ★ | 5 | | Moderate | |  | |
| 40 | Kisieliene et al. (2024) | | ★ | ★ | ★ | ★ | ★ | ✖ | ★ | ★ | ★ | 8 | ★ | ★ | ★ | ✖ | ★ | ★ | ★ | 6 | | High | |  | |
| 41 | Barbarot et al. (2022) | | ★ | ★ | ★ | ★ | ★ | ★ | ★ | ★ | ★ | 9 | ★ | ★ | ★ | ★ | ★ | ★ | ★ | 7 | | High | |  | |
| 42 | Kotarski et al. (2023) | | ★ | ★ | ★ | ★ | ★ | ✖ | ★ | ★ | ★ | 8 | ★ | ✖ | ★ | ✖ | ★ | ★ | ★ | 5 | | Moderate | |  | |
| 43 | Al Shobaili (2010) | | ★ | ★ | ★ | ★ | ★ | ✖ | ★ | ★ | ★ | 8 | ★ | ✖ | ★ | ✖ | ★ | ★ | ★ | 5 | | Moderate | |  | |
| 44 | Ho et al. (2010) | | ★ | ★ | ★ | ★ | ★ | ✖ | ★ | ★ | ★ | 8 | ★ | ✖ | ★ | ✖ | ★ | ★ | ★ | 5 | | Moderate | |  | |
| 45 | Knibb et al. (2012) | | ★ | ★ | ★ | ★ | ★ | ✖ | ★ | ★ | ★ | 8 | ★ | ✖ | ★ | ✖ | ★ | ★ | ★ | 5 | | Moderate | |  | |
| 46 | Springston et al. (2010) | | ★ | ★ | ✖ | ★ | ★ | ✖ | ★ | ★ | ✖ | 6 | ★ | ★ | ★ | ★ | ★ | ★ | ★ | 7 | | High | |  | |
| 47 | Howe et al. (2014) | | ★ | ★ | ✖ | ★ | ★ | ★ | ★ | ★ | ✖ | 7 | ★ | ★ | ★ | ✖ | ★ | ★ | ★ | 6 | | High | |  | |
| 48 | Pappalardo et al. (2022) | | ★ | ★ | ★ | ★ | ★ | ★ | ★ | ★ | ★ | 9 | ★ | ★ | ★ | ★ | ★ | ★ | ★ | 7 | | High | |  | |
| 49 | Tawfik et al. (2023) | | ★ | ★ | ★ | ★ | ★ | ✖ | ★ | ★ | ★ | 8 | ★ | ✖ | ★ | ✖ | ★ | ★ | ★ | 5 | | Moderate | |  | |
| 50 | Kobusiewicz et al. (2023) | | ★ | ✖ | ★ | ★ | ★ | ✖ | ★ | ★ | ✖ | 6 | ★ | ★ | ★ | ★ | ★ | ★ | ★ | 7 | | High | |  | |
| 51 | Mozyrska et al. (2023) | | ★ | ★ | ★ | ★ | ★ | ✖ | ★ | ★ | ★ | 8 | ★ | ✖ | ★ | ✖ | ★ | ★ | ★ | 5 | | Moderate | |  | |

*NOS total score range: 0–9 stars. Higher scores indicate lower risk of bias.*

*RELEVANT total score range: 0–7 fulfilled domains. Higher scores indicate stronger real-world evidence applicability.*

*✖ = criterion not fulfilled.*

Quantitative quality-of-life outcomes across included studies are summarized in Table 6.

***Table 6****. Quantitative quality-of-life outcomes across included studies*

| No | First Author (Year) | Allergy Type | Instrument | Domain / Score Range [Worst–Best] | QoL Score | |
| --- | --- | --- | --- | --- | --- | --- |
| 1 | Kelbore (2025) | Atopic Dermatitis | DFI | [0–30, worst=30] | 9.64 ± 6.44 |
| 2 | Andrade (2023) | Atopic Dermatitis | DFI | [0–30, worst=30] | rs 0.74 ↑severity  ↑ family burden |
| 3 | Jirakova (2012) | Atopic Dermatitis | DFI | [0–30, worst=30] | 7.98 ± 6.41 |
| 4 | Chernyshov (2014) | Atopic Dermatitis | DFI; FDLQI | [0–30, worst=30] | DFI 10.7 ± 5.6 / FDLQI Mean 11.8 ± SD 5.8 |
| 5 | Chernyshov (2013) | Atopic Dermatitis | DFI | [0–30, worst=30] | Ukraine 9.44 ± 5.69   |  | | --- |   Czech Republic 7.43 ± 5.86  Singapore 8.45 ± 6.97  Brazil 8.37 ± 4.43  South Korea 10.04 ± 7.57 |
| 6 | Comlek (2020) | Atopic Dermatitis | FDLQI | [0–30, worst=30] | Median 5.0 |
| 7 | Ricci (2007) | Atopic Dermatitis | DFI | [0–30, worst=30] | Mean 11.0 |
| 8 | Ghani (2013) | Atopic Dermatitis | DFI | [0–30, worst=30] | Median 7.0 |
| 9 | Jang (2016) | Atopic Dermatitis | DFI | [0–30, worst=30] | 11.2 ± 6.0 |
| 10 | Siafaka (2020) | Atopic Dermatitis | DFI | [0–30, worst=30] | 9.42 ± 7.03 |
| 11 | Ailawadi (2024) | Atopic Dermatitis | DFI | [0–30, worst=30] | 11.7 ± 2.32 |
| 12 | Campos (2017) | Atopic Dermatitis | DFI | [0–30, worst=30] | 6.6 ± 4.5 |
| 13 | Raznatovic (2021) | Atopic Dermatitis | DFI | [0–30, worst=30] | 19.86 |
| 14 | Ezzedine (2020) | Atopic Dermatitis | ABS-F | [0–30, worst=30] | 10 ± 8 |
| 15 | Maksimovic (2019) | Atopic Dermatitis | DFI | [0–30, worst=30] | 12.6 |
| 16 | Chernyshov (2015) | Atopic Dermatitis | DFI | [0–30, worst=30] | Singapore 6.51 ± 6.16  Czech Republic 8.26 ± 7.11  Italy 5.58 ± 5.52  Ukraine 15.59 ± 6.05 |
| 17 | Pedersen (2021) | Atopic Dermatitis | DFI | [0–30 worst] | IDQOL 2.67 vs 1.95 |
| 18 | Pustišek (2016) | Atopic Dermatitis | FDLQI | [0–30 worst] | Mean ± SD 16.45 ±6.56 |
| 19 | Saeki (2023) | Atopic Dermatitis | DFI | [0–30 worst] | <6y 3.98 ± 5.76 |
|  |  |  |  |  | 6-12y 2.47 ± 4.29  12-18y 2.35 ± 4.21 |
| 20 | Al Robaee (2010) | Atopic Dermatitis | DFI | [0–30 worst] | 13.86 ± 4.23 |
| 21 | Otsuka (2024) | Atopic Dermatitis | DFI | [0–30 worst] | 11.7 ± 7.2 |
| 22 | Tawfik (2023) | Atopic Dermatitis | FDLQI | [0–30 worst] | Mean 11.17 |
| 23 | Kobusiewicz (2023) | Atopic Dermatitis | FDLQI | [0–30 worst] | 16.45 ± 6.56 |
| 24 | Raznatovic (2020) | Atopic Dermatitis | DFI | [0–30 worst] | 19.86 ± 4.36 |
| 25 | Monti (2011) | Atopic Dermatitis | DFI | [0–30 worst] | Mild 3.38 ± 5.02  Moderate 8.1 ± 5.30  Severe 12.79 ± 5.30 |
| 26 | Marciniak (2017) | Atopic Dermatitis | FDLQI | [0–30 worst] | 17.1 vs 14.7 (mother vs father) |
| 27 | Ozsaydi (2021) | Atopic Dermatitis | FIS-DD | [higher=worse] | 2-4 Years 23.5 ± 13.1  5-7 Years 19.1 ± 12.4 |
| 28 | Barbarot (2022) | Atopic Dermatitis | DFI | [0–30 worst] | 7.1–17.2 (mild→severe) |
| 29 | Kotarski (2023) | Atopic Dermatitis | FDLQI | [0–30 worst] | Median 12 (IQR 7–16) |
| 30 | Al Shobaili (2010) | Atopic Dermatitis | DFI | [0–30 worst] | Mean 13.9 |
| 31 | Ho (2010) | Atopic Dermatitis | DFI | [0–30 worst] | 7.2 ± 6.5 |
| 32 | Mozyrska (2023) | Atopic Dermatitis | FDLQI | [0–30 worst] | 6.4 ± 2.8 |
| 33 | Wisuthsarewong (2017) | Atopic Dermatitis | DFI | [0–30 worst] | 9.94 ± 7.49 |
| 34 | Kisieliene (2024) | Atopic Dermatitis | FDLQI | [0–30 worst] | 7.1 ± 6.9 |
| 35 | Barber (2025) | Food Allergy | FAQL-PB | [1–7, worst=7] | 1.54, 1.34 |
| 36 | Ward (2016) | Food Allergy | FAQL-PB | [1–7, worst=7] | Mean 2.67  (RC=1.84 vs SS= 2.81) |
| 37 | Fathi (2016) | Food Allergy | FAQL-PB | [1–7, worst=7] | (Not reported, Item burden analysis) |
| 38 | Allen (2015) | Food Allergy | FAQL-PB | [1–7, worst=7] | 1.3 ± 2.0 |
| 39 | Cummings (2010) | Nut Allergy | FAQL-PB | [1–120,worst] | 56.27 ± 25.35 |
| 40 | Jung (2023) | Food Allergy | FAQL-PB | [1–7 worst] | 4.3 ± 1.3 |
|  |  |  |  |  |  |
| 41 | Acaster (2020) | Peanut Allergy | FAQL-PB | [1–7 worst] | Mean 2.98  SD 1.56 |
| 42 | Leung (2009) | Food Allergy | FAQL-PB | [1–7 worst] | 0.10 vs 0 (controls) |
| 43 | Pappalardo (2022) | Food Allergy | FAQL-PB | [1–7 worst] | Mean 3.9 |
| 44 | Kajornrattana (2018) | Food Allergy | FAQL-PB | [1–10 worst] | Not reported, (Item burden analysis) |
| 45 | Patel (2018) | Peanut Allergy | FAQL-PB | [1–120 worst] | 53.1 ± 22.6 |
| 46 | Knibb (2012) | Food Allergy | FAQL-PB | [1–120 worst] | 69.99 ± 23.17 |
| 47 | Springston (2010) | Food Allergy | FAQL-PB | [1–7 worst] | Not reported, (Item burden analysis) |
| 48 | Howe (2014) | Food Allergy | FAQL-PB | [1–7 worst] | Mean 1.88 |
| 49 | Williams (2015) | Food Allergy | FAQL-PB | [1–120 worst] | 22.14 ± 73.17 |
| 50 | Morawska (2022) | Eczema / Asthma | PedQL - FIM | [0–100, best=100] | 59.74 ± 17.41 |
| 51 | Klinnert (2014) | Eosinophilic Esophagitis | PedsQL-FIM | [0–100, best=100] | 66.9 ± 20.0 |

** Different versions and adaptations of the FAQL-PB instrument were used across studies, resulting in variation in scoring ranges.*

**ABS-F (Atopic Burden Scale – Family) was also used as a validated measure of family burden in atopic dermatitis.*

*** *Higher scores indicate worse QoL/family burden unless otherwise specified.*

*** *Studies reported outcomes using heterogeneous statistical formats including mean ± SD, median (IQR), correlations, and regression coefficients according to the original publications.*

**Values are reported as presented in the original studies (mean ± SD, median, or correlation coefficients where applicable).*
